# Supplementary material for: Description of Aequorivita aurantiaca sp. nov. Isolated from Coastal Sediment, and Comparative Genomic Analysis and Biogeographic Distribution of the Genus Aequorivita
Source: MDPI journal article supplement (doi:10.3390/microorganisms11102518), 2023-10-09
Supplement: s1 [file s1]

## Supplementary Materials

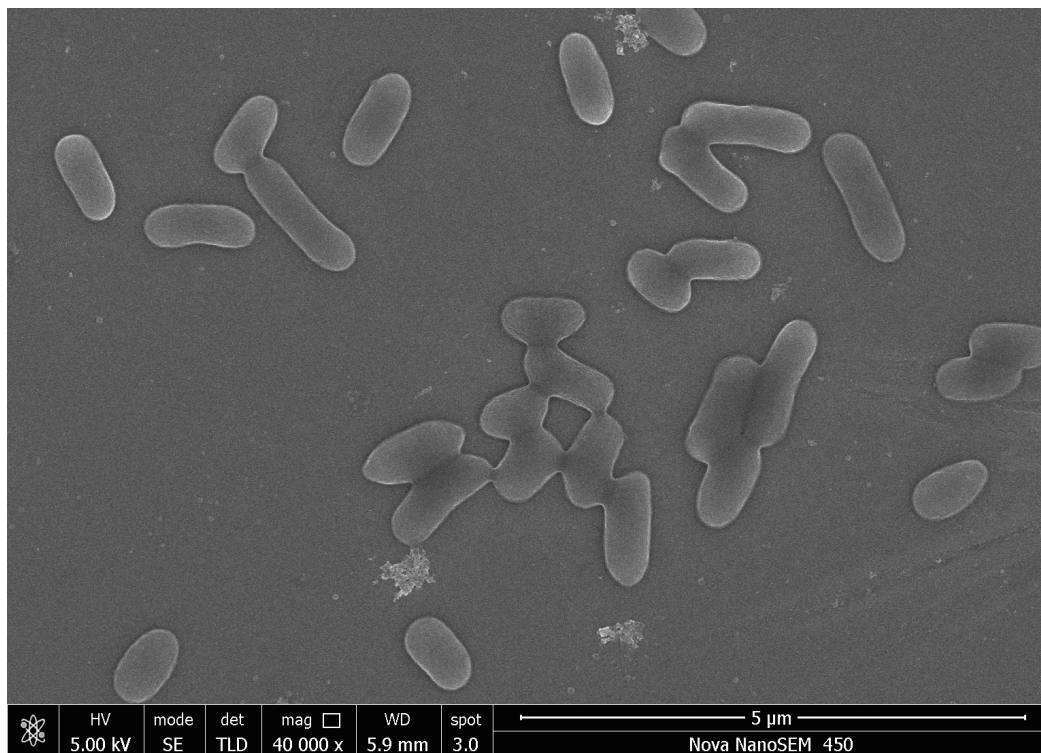

**Figure S1.** Scanning electron micrograph of cells of strain SDUM287046<sup>T</sup>. Bar, 5 μm.

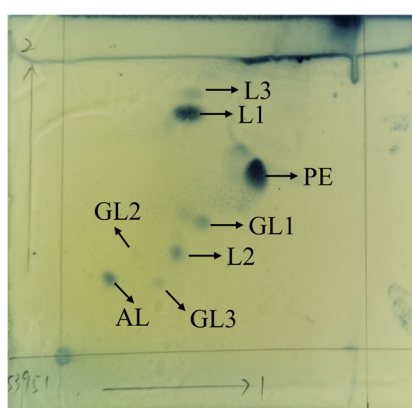

(a)

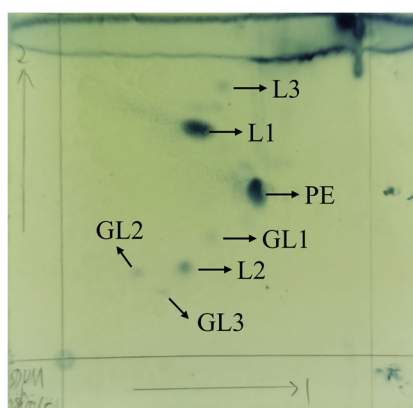

(b)

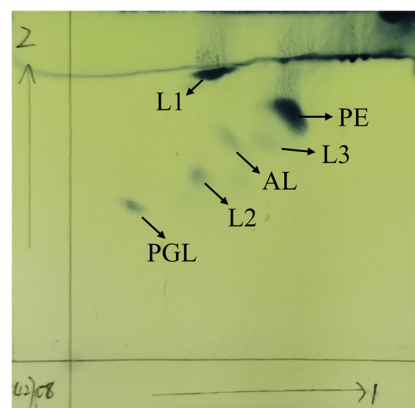

(c)

**Figure S2.** Two-dimensional TLC plate image of the total polar lipids of strain SDUM287046<sup>T</sup> (a), *A. antarctica* DSM 14231<sup>T</sup> (b) and *A. aquimaris* KCTC 42708<sup>T</sup> (c). PE, phosphatidylethanolamine; PGL, phosphoglycolipid; AL, unidentified aminolipid; GL, unidentified glycolipid; L, unidentified lipid.

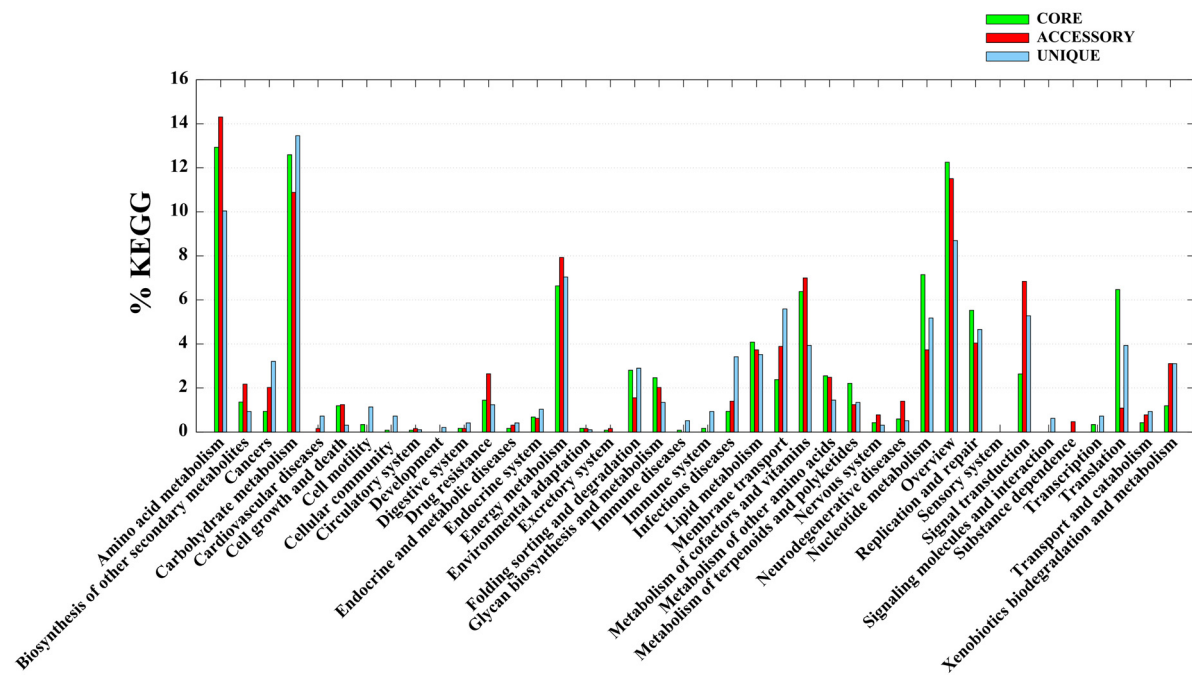

**Figure S3.** The distribution of core genes, accessory genes and unique genes to different metabolic pathways in the genus *Aequorivita*.

**Table S1.** Cellular fatty acids composition (%) of the strain SDUM287046<sup>T</sup> and experimental strains.

| <b>Fatty acid</b>          | <b>1</b>    | <b>2</b>    | <b>3</b>    |
|----------------------------|-------------|-------------|-------------|
| <i>Saturated</i>           |             |             |             |
| C <sub>16:0</sub>          | 1.5         | 1.1         | 1.2         |
| <i>Branched</i>            |             |             |             |
| iso-C <sub>14:0</sub>      | TR          | 2.2         | TR          |
| iso-C <sub>15:0</sub>      | <b>30.2</b> | <b>36.8</b> | <b>34.2</b> |
| anteiso-C <sub>15:0</sub>  | <b>17.2</b> | 7.6         | 7.4         |
| iso-C <sub>15:1</sub> G    | 2.5         | 7.2         | 8.1         |
| iso-C <sub>16:0</sub>      | 1.2         | TR          | TR          |
| <i>Hydroxy</i>             |             |             |             |
| iso-C <sub>15:0</sub> 3-OH | 1.8         | 3.1         | 3.8         |
| C <sub>15:0</sub> 2-OH     | 1.4         | TR          | TR          |
| iso-C <sub>16:0</sub> 3-OH | 1.8         | TR          | 1.4         |
| iso-C <sub>17:0</sub> 3-OH | <b>14.9</b> | <b>20.0</b> | <b>21.6</b> |
| C <sub>17:0</sub> 2-OH     | 5.0         | 1.0         | 1.2         |
| <i>Summed Feature</i>      |             |             |             |
| Summed Feature 3*          | 5.0         | 6.1         | 3.6         |
| Summed Feature 9*          | <b>11.6</b> | 9.7         | <b>11.1</b> |

Strains: 1, SDUM287046<sup>T</sup>; 2, *A. aquimaris* KCTC 42708<sup>T</sup>; 3, *A. antarctica* DSM 14231<sup>T</sup>. All data listed in the table are from this study. TR, trace (<1.0%); Fatty acids present at >10% are indicated in bold.

\*Summed features are groups of two or three fatty acids that cannot be separated by GLC using the MIDI system. Summed feature 3 consists of C<sub>16:1</sub> ω7c and/or C<sub>16:1</sub> ω6c and summed feature 9 consists of iso-C<sub>17:1</sub> ω9c and/or C<sub>16:0</sub> 10-methyl.

**Table S2.** Genomic dataset of the strains analyzed in the pan-genome analysis.

| Strains                                                   | Genome size | GC content (%) | Accession number |
|-----------------------------------------------------------|-------------|----------------|------------------|
| strain SDUM287046 <sup>T</sup>                            | 3,093,921   | 39.3           | JAUGQQ000000000  |
| <i>Aequorivita antarctica</i> SW49 <sup>T</sup>           | 3,844,651   | 37.2           | GCA_007997155    |
| <i>Aequorivita aquimaris</i> D-24 <sup>T</sup>            | 3,147,268   | 40.0           | GCA_001573155    |
| <i>Aequorivita capsosiphonis</i> DSM 23843 <sup>T</sup>   | 4,042,904   | 36.9           | GCA_000429125    |
| <i>Aequorivita echinoideorum</i> JCM30378 <sup>T</sup>    | 2,929,928   | 38.7           | GCA_018476645    |
| <i>Aequorivita iocasae</i> KX20305 <sup>T</sup>           | 3,353,883   | 38.7           | GCA_016757735    |
| <i>Aequorivita lipolytica</i> CIP107455 <sup>T</sup>      | 3,305,581   | 37.7           | GCA_900489485    |
| <i>Aequorivita lutea</i> q18 <sup>T</sup>                 | 3,369,026   | 42.8           | GCA_009668655    |
| <i>Aequorivita sinensis</i> S1-10 <sup>T</sup>            | 3,181,804   | 34.6           | GCA_006346335    |
| <i>Aequorivita soesokkakensis</i> RSSK-12 <sup>T</sup>    | 3,190,776   | 37.9           | GCA_001641085    |
| <i>Aequorivita sublithicola</i> DSM 14238 <sup>T</sup>    | 3,520,671   | 36.2           | GCA_000265385    |
| <i>Aequorivita todarodis</i> KCTC 62141 <sup>T</sup>      | 3,331,876   | 41.1           | GCA_028561335    |
| <i>Aequorivita viscosa</i> DSM 26349 <sup>T</sup>         | 3,526,892   | 36.6           | GCA_900141955    |
| <i>Aequorivita vitellina</i> F47161 <sup>T</sup>          | 3,633,834   | 37.4           | GCA_022008365    |
| <i>Aequorivita vladivostokensis</i> KMM 3516 <sup>T</sup> | 3,269,452   | 40.8           | GCA_000952855    |
| <i>Aequorivita xiaoshiensis</i> F64183 <sup>T</sup>       | 3,066,048   | 34.5           | GCA_022008395    |
